# Supplementary material for: Assessment of the Transmission Dynamics of Clostridioides difficile in a Farm Environment Reveals the Presence of a New Toxigenic Strain Connected to Swine Production
Source: Front Microbiol. 2022 Apr 14;13:858310. doi: 10.3389/fmicb.2022.858310 (PMC9050547; doi:10.3389/fmicb.2022.858310)
Supplement: Supplementary file 2 [file Table_1.XLSX]

## Sheet: Folha1
Table S1 - Clostridioides difficile isolates used in this study.
								Toxin gene profile
Sample ID	Isolation Country	Isolation Year	Source	Sample type	MLST_ST	MLST clade	Ribotype	tcdA	tcdB	cdtA/cdtB	BioSample Accession Number	Run Accession Number	GenBank Accession Numer	Study
Non fertilized soil	Portugal	2020	Environment	Agricultural soil	11	5	RT033	tcdA+*	tcdB+	cdtA+/cdtB+	SAMEA12074921	ERR7867817	-	this study
Fertilized soil	Portugal	2020	Environment	Agricultural soil	11	5	RT033	tcdA+*	tcdB+	cdtA+/cdtB+	SAMEA12074922	ERR7867818	-	this study
Forest	Portugal	2020	Environment	Non-agricultural soil	11	5	RT033	tcdA+*	tcdB+	cdtA+/cdtB+	SAMEA12074923	ERR7867826	-	this study
Meadow	Portugal	2020	Environment	Non-agricultural soil	11	5	RT033	tcdA+*	tcdB+	cdtA+/cdtB+	SAMEA12074924	ERR7867824	-	this study
WTP-SS	Portugal	2020	Environment	Water	11	5	RT033	tcdA+*	tcdB+	cdtA+/cdtB+	SAMEA12074925	ERR7867828	-	this study
Cesspool_1	Portugal	2020	Environment	Manure/cesspool	11	5	RT033	tcdA+*	tcdB+	cdtA+/cdtB+	SAMEA12074926	ERR7867820	-	this study
Cesspool_2	Portugal	2020	Environment	Manure/cesspool	11	5	RT033	tcdA+*	tcdB+	cdtA+/cdtB+	SAMEA12074927	ERR7867825	-	this study
Cesspool_3	Portugal	2020	Environment	Manure/cesspool	11	5	RT033	tcdA+*	tcdB+	cdtA+/cdtB+	SAMEA12074928	ERR7867829	-	this study
Cesspool_4	Portugal	2020	Environment	Manure/cesspool	11	5	RT033	tcdA+*	tcdB+	cdtA+/cdtB+	SAMEA12074929	ERR7867841	-	this study
Cesspool_5	Portugal	2020	Environment	Manure/cesspool	11	5	RT033	tcdA+*	tcdB+	cdtA+/cdtB+	SAMEA12074930	ERR7867832	-	this study
Cesspool_6	Portugal	2020	Environment	Manure/cesspool	11	5	RT033	tcdA+*	tcdB+	cdtA+/cdtB+	SAMEA12074931	ERR7867830	-	this study
Manure_1	Portugal	2020	Environment	Manure/cesspool	11	5	RT033	tcdA+*	tcdB+	cdtA+/cdtB+	SAMEA12074932	ERR7867834	-	this study
Manure_2	Portugal	2020	Environment	Manure/cesspool	11	5	RT033	tcdA+*	tcdB+	cdtA+/cdtB+	SAMEA12074933	ERR7867816	-	this study
Manure_3	Portugal	2020	Environment	Manure/cesspool	11	5	RT033	tcdA+*	tcdB+	cdtA+/cdtB+	SAMEA12074934	ERR7867831	-	this study
Manure_4	Portugal	2020	Environment	Manure/cesspool	11	5	RT033	tcdA+*	tcdB+	cdtA+/cdtB+	SAMEA12074935	ERR7867827	-	this study
Piglet_1	Portugal	2020	Animal	Piglet, faeces	11	5	RT033	tcdA+*	tcdB+	cdtA+/cdtB+	SAMEA12074936	ERR7867838	-	this study
Piglet_2	Portugal	2020	Animal	Piglet, faeces	11	5	RT033	tcdA+*	tcdB+	cdtA+/cdtB+	SAMEA12074937	ERR7867836	-	this study
Piglet_3	Portugal	2020	Animal	Piglet, faeces	11	5	RT033	tcdA+*	tcdB+	cdtA+/cdtB+	SAMEA12074938	ERR7867840	-	this study
Piglet_4	Portugal	2020	Animal	Piglet, faeces	11	5	RT033	tcdA+*	tcdB+	cdtA+/cdtB+	SAMEA12074939	ERR7867821	-	this study
Piglet_5	Portugal	2020	Animal	Piglet, faeces	11	5	RT033	tcdA+*	tcdB+	cdtA+/cdtB+	SAMEA12074940	ERR7867823	-	this study
Sow_1	Portugal	2020	Animal	Sow, faeces	11	5	RT033	tcdA+*	tcdB+	cdtA+/cdtB+	SAMEA12074941	ERR7867837	-	this study
Sow_2	Portugal	2020	Animal	Sow, faeces	11	5	RT033	tcdA+*	tcdB+	cdtA+/cdtB+	SAMEA12074942	ERR7867822	-	this study
Sow_3	Portugal	2020	Animal	Sow, faeces	11	5	RT033	tcdA+*	tcdB+	cdtA+/cdtB+	SAMEA12074943	ERR7867839	-	this study
Sow_4	Portugal	2020	Animal	Sow, faeces	11	5	RT033	tcdA+*	tcdB+	cdtA+/cdtB+	SAMEA12074944	ERR7867833	-	this study
Sow_5	Portugal	2020	Animal	Sow, faeces	11	5	RT033	tcdA+*	tcdB+	cdtA+/cdtB+	SAMEA12074945	ERR7867835	-	this study
Sow_6	Portugal	2020	Animal	Sow, faeces	11	5	RT033	tcdA+*	tcdB+	cdtA+/cdtB+	SAMEA12074946	ERR7867819	-	this study
M120	Ireland	2007	Human	Unknown	11	5	RT078	tcdA+	tcdB+	cdtA+/cdtB+	SAMEA742899	ERR027342	-	Knight et al., 2019
C00002448	United Kingdom	2008	Human	Unknown	11	5	RT033	tcdA-	tcdB-	cdtA+/cdtB+	SAMEA1487099	ERR126274	-	Dingle et al., 2013
RPH0101	Australia	2007	Human	Hospital	11	5	RT033	tcdA-	tcdB-	cdtA+/cdtB+	SAMEA96584668	ERR1854839	-	McGovern et al., 2017
OCD52	Slovenia	Unknown	Unknown	Unknown	11	5	RT033	tcdA-	tcdB-	cdtA+/cdtB+	SAMEA104421575	ERR2215990	-	Bletz et al., 2018
OCD52	Slovenia	Unknown	Unknown	Unknown	11	5	RT033	tcdA-	tcdB-	cdtA+/cdtB+	SAMEA104421575	ERR2215991	-	Bletz et al., 2018
IS58	Unknown	Unknown	Unknown	Unknown	11	5	RT033	tcdA-	tcdB-	cdtA+/cdtB+	SAMN02904025	SRR1519394	-	Knetsch et al., 2012
C001	Australia	2012	Human	Hospital	11	5	RT126	tcdA+	tcdB+	cdtA+/cdtB+	SAMEA5086541	ERR2898744	-	Knight et al., 2019
C055	Australia	2006	Human	Hospital	11	5	RT127	tcdA+	tcdB+	cdtA+/cdtB+	SAMEA5086593	ERR2898796	-	Knight et al., 2019
C057	Australia	2006	Human	Hospital	11	5	RT127	tcdA+	tcdB+	cdtA+/cdtB+	SAMEA5086595	ERR2898798	-	Knight et al., 2019
C069	Australia	2014	Human	Hospital	11	5	RT127	tcdA+	tcdB+	cdtA+/cdtB+	SAMEA5086607	ERR2898810	-	Knight et al., 2019
C082	Japan	2010	Human	Hospital	11	5	RT127	tcdA+	tcdB+	cdtA+/cdtB+	SAMEA5086620	ERR2898823	-	Knight et al., 2019
C090	Australia	2012	Human	Hospital	11	5	RT033	tcdA-	tcdB-	cdtA+/cdtB+	SAMEA5086628	ERR2898831	-	Knight et al., 2019
C091	Australia	2012	Human	Hospital	11	5	RT033	tcdA-	tcdB-	cdtA+/cdtB+	SAMEA5086629	ERR2898832	-	Knight et al., 2019
C092	Australia	2006	Human	Hospital	11	5	RT033	tcdA-	tcdB-	cdtA+/cdtB+	SAMEA5086630	ERR2898833	-	Knight et al., 2019
C093	Australia	2006	Human	Hospital	11	5	RT033	tcdA-	tcdB-	cdtA+/cdtB+	SAMEA5086631	ERR2898834	-	Knight et al., 2019
C094	Australia	2006	Human	Hospital	11	5	RT033	tcdA-	tcdB-	cdtA+/cdtB+	SAMEA5086632	ERR2898835	-	Knight et al., 2019
C095	Australia	1980	Human	Hospital	11	5	RT033	tcdA-	tcdB-	cdtA+/cdtB+	SAMEA5086633	ERR2898836	-	Knight et al., 2019
C096	Australia	1982	Human	Hospital	11	5	RT033	tcdA-	tcdB-	cdtA+/cdtB+	SAMEA5086634	ERR2898837	-	Knight et al., 2019
C097	Australia	2007	Human	Hospital	11	5	RT033	tcdA-	tcdB-	cdtA+/cdtB+	SAMEA5086635	ERR2898838	-	Knight et al., 2019
C098	Australia	2007	Human	Hospital	11	5	RT033	tcdA-	tcdB-	cdtA+/cdtB+	SAMEA5086636	ERR2898839	-	Knight et al., 2019
C099	Australia	2013	Human	Hospital	11	5	RT033	tcdA-	tcdB-	cdtA+/cdtB+	SAMEA5086637	ERR2898840	-	Knight et al., 2019
C100	France	2012	Human	Hospital	11	5	RT033	tcdA-	tcdB-	cdtA+/cdtB+	SAMEA5086638	ERR2898841	-	Knight et al., 2019
C101	France	2012	Human	Hospital	11	5	RT033	tcdA-	tcdB-	cdtA+/cdtB+	SAMEA5086639	ERR2898842	-	Knight et al., 2019
C102	France	2011	Human	Hospital	11	5	RT033	tcdA-	tcdB-	cdtA+/cdtB+	SAMEA5086640	ERR2898843	-	Knight et al., 2019
C103	France	2012	Human	Hospital	11	5	RT033	tcdA-	tcdB-	cdtA+/cdtB+	SAMEA5086641	ERR2898844	-	Knight et al., 2019
C104	France	2013	Human	Hospital	11	5	RT033	tcdA-	tcdB-	cdtA+/cdtB+	SAMEA5086642	ERR2898845	-	Knight et al., 2019
C105	France	2012	Human	Hospital	11	5	RT033	tcdA-	tcdB-	cdtA+/cdtB+	SAMEA5086643	ERR2898846	-	Knight et al., 2019
C106	Australia	2006	Human	Hospital	11	5	RT288	tcdA-	tcdB-	cdtA+/cdtB+	SAMEA5086644	ERR2898847	-	Knight et al., 2019
C127	Australia	2011	Human	Hospital	11	5	RT078	tcdA+	tcdB+	cdtA+/cdtB+	SAMEA5086665	ERR2898868	-	Knight et al., 2019
C139	Australia	2012	Human	Hospital	11	5	QX060	tcdA-	tcdB+	cdtA+/cdtB+	SAMEA5086667	ERR2898870	-	Knight et al., 2019
C140	Australia	2012	Human	Hospital	11	5	QX124	tcdA+	tcdB+	cdtA+/cdtB+	SAMEA5086668	ERR2898871	-	Knight et al., 2019
C141	Australia	2015	Human	Hospital	11	5	QX149	tcdA+	tcdB+	cdtA+/cdtB+	SAMEA5086669	ERR2898872	-	Knight et al., 2019
C142	Australia	2015	Human	Hospital	11	5	QX216	tcdA+	tcdB+	cdtA+/cdtB+	SAMEA5086670	ERR2898873	-	Knight et al., 2019
C143	Australia	2012	Human	Hospital	11	5	QX220	tcdA+	tcdB+	cdtA+/cdtB+	SAMEA5086671	ERR2898874	-	Knight et al., 2019
C144	Australia	2012	Human	Hospital	11	5	RT078	tcdA+	tcdB+	cdtA+/cdtB+	SAMEA5086672	ERR2898875	-	Knight et al., 2019
C146	Australia	2015	Human	Hospital	11	5	QX528	tcdA+	tcdB+	cdtA+/cdtB+	SAMEA5086674	ERR2898877	-	Knight et al., 2019
C147	Australia	2012	Human	Hospital	11	5	QX009	tcdA+	tcdB+	cdtA+/cdtB+	SAMEA5086675	ERR2898878	-	Knight et al., 2019
C148	New Zeland	2012	Human	Hospital	11	5	QX399	tcdA+	tcdB+	cdtA+/cdtB+	SAMEA5086676	ERR2898879	-	Knight et al., 2019
C149	Taiwan	2011	Human	Hospital	11	5	QX404	tcdA+	tcdB+	cdtA+/cdtB+	SAMEA5086677	ERR2898880	-	Knight et al., 2019
C150	Thailand	2015	Human	Hospital	11	5	QX538	tcdA+	tcdB+	cdtA+/cdtB+	SAMEA5086678	ERR2898881	-	Knight et al., 2019
V010	Italia	2008	Animal	Bovine (calf), faeces	11	5	RT126	tcdA+	tcdB+	cdtA+/cdtB+	SAMEA5086693	ERR2898896	-	Knight et al., 2019
V017	Australia	2012	Animal	Bovine (calf), faeces	11	5	RT127	tcdA+	tcdB+	cdtA+/cdtB+	SAMEA5086700	ERR2898903	-	Knight et al., 2019
V022	Australia	2012	Animal	Bovine (calf), faeces	11	5	RT033	tcdA-	tcdB-	cdtA+/cdtB+	SAMEA5086705	ERR2898908	-	Knight et al., 2019
V032	Italy	2008	Animal	Porcine (pig), faeces	11	5	RT127	tcdA+	tcdB+	cdtA+/cdtB+	SAMEA5086715	ERR2898918	-	Knight et al., 2019
V033	Australia	2012	Animal	Bovine (calf), faeces	11	5	RT033	tcdA-	tcdB-	cdtA+/cdtB+	SAMEA5086716	ERR2898919	-	Knight et al., 2019
V034	Australia	2012	Animal	Bovine (calf), faeces	11	5	RT033	tcdA-	tcdB-	cdtA+/cdtB+	SAMEA5086717	ERR2898920	-	Knight et al., 2019
V035	Australia	2013	Animal	Bovine (calf), carcase washing	11	5	RT033	tcdA-	tcdB-	cdtA+/cdtB+	SAMEA5086718	ERR2898921	-	Knight et al., 2019
V036	Australia	2012	Animal	Porcine (piglet), faeces	11	5	RT033	tcdA-	tcdB-	cdtA+/cdtB+	SAMEA5086719	ERR2898922	-	Knight et al., 2019
V037	Australia	2012	Animal	Porcine (piglet), faeces	11	5	RT033	tcdA-	tcdB-	cdtA+/cdtB+	SAMEA5086720	ERR2898923	-	Knight et al., 2019
V038	Australia	2013	Animal	Bovine (calf), carcase washing	11	5	RT288	tcdA-	tcdB-	cdtA+/cdtB+	SAMEA5086721	ERR2898924	-	Knight et al., 2019
V042	The Netherlands	2011	Animal	Porcine (piglet), faeces	11	5	RT078	tcdA+	tcdB+	cdtA+/cdtB+	SAMEA1710523	ERR257046	-	Knetsch et al., 2014
V052	Australia	2012	Animal	Bovine (calf), faeces	11	5	RT033	tcdA-	tcdB-	cdtA+/cdtB+	SAMEA5086725	ERR2898928	-	Knight et al., 2019
E001	Australia	2015	Environment	Soil irrigated with effluent	11	5	RT033	tcdA-	tcdB-	cdtA+/cdtB+	SAMEA5086679	ERR2898882	-	Knight et al., 2019
E002	Australia	2015	Environment	Soil irrigated with effluent	11	5	RT033	tcdA-	tcdB-	cdtA+/cdtB+	SAMEA5086680	ERR2898883	-	Knight et al., 2019
E003	Australia	2015	Environment	Treated liquid effluent	11	5	RT033	tcdA-	tcdB-	cdtA+/cdtB+	SAMEA5086681	ERR2898884	-	Knight et al., 2019
E004	Australia	2015	Environment	Treated liquid effluent	11	5	RT033	tcdA-	tcdB-	cdtA+/cdtB+	SAMEA5086682	ERR2898885	-	Knight et al., 2019
E005	Australia	2015	Environment	Organic potato (farmers market)	11	5	RT033	tcdA-	tcdB-	cdtA+/cdtB+	SAMEA5086683	ERR2898886	-	Knight et al., 2019
DSM 101085	Germany	2015	Human	Unknown	11	5	RT033	tcdA-	tcdB-	cdtA+/cdtB+	SAMN06298620	-	NZ_CP021329.1	Riedel et al., 2020
M120	Ireland	2007	Human	Unknown	11	5	RT078	tcdA+	tcdB+	cdtA+/cdtB+	SAMEA3138368	-	NC_017174.1	He et al., 2010
WTP-SS - water treatment plant, sewage sludge
Daniel R. Knight et al. mBio, 2019, 9. https://doi.org/10.1128/mBio.00446-19.
Knetsch CW, Connor TR, Mutreja A, van Dorp SM, Sanders IM, Browne HP, et al. 2014. Whole genome sequencing reveals potential spread of Clostridium difficile between humans and farm animals in the Netherlands, 2002 to 2011. Euro Surveill 19:30-41.
He M, Sebaihia M, Lawley TD, Stabler RA, Dawson LF, Martin MJ, et al. 2010. Evolutionary dynamics of Clostridium difficile over short and long time scales. Proc Natl Acad Sci U S A 107:7527-32.
Knetsch CW, Terveer EM, Lauber C, Gorbalenya AE, Harmanus C, Kuijper EJ, Corver J, van Leeuwen HC. 2012. Comparative analysis of an expanded Clostridium difficile reference strain collection reveals genetic diversity and evolution through six lineages. Infect Genet Evol 12(7): 1577-1585
Riedel T et al, GBE, 2020
Dingle KE, Didelot X, Ansari MA, Eyre DW, Vaughan A, Griffiths D, Ip CL, Batty EM, Golubchik T, Bowden R, Jolley KA, Hood DW, Fawley WN, Walker AS, Peto TE, Wilcox MH, Crook DW. Recombinational switching of the Clostridium difficile S-layer and a novel glycosylation gene cluster revealed by large-scale whole-genome sequencing. J Infect Dis. 2013 Feb 15;207(4):675-86. doi: 10.1093/infdis/jis734.
McGovern AM, Androga GO, Knight DR, Watson MW, Elliott B, Foster NF, Chang BJ, Riley TV. Prevalence of binary toxin positive Clostridium difficile in diarrhoeal humans in the absence of epidemic ribotype 027. PLoS One. 2017 Nov 8;12(11):e0187658. doi: 10.1371/journal.pone.0187658.
Bletz S, Janezic S, Harmsen D, Rupnik M, Mellmann A. Defining and Evaluating a Core Genome Multilocus Sequence Typing Scheme for Genome-Wide Typing of Clostridium difficile. J Clin Microbiol. 2018 May 25;56(6):e01987-17. doi: 10.1128/JCM.01987-17.
